# Supplementary material for: Refining the diagnosis of gestational diabetes mellitus: a systematic review and meta-analysis
Source: PubMed Central journal article supplement (PMC10728189; doi:10.1038/s43856-023-00393-8), 2023-12-18
Supplement: 43856_2023_393_MOESM1_ESM.pdf [file 43856_2023_393_MOESM1_ESM.pdf]

## Description of Additional Supplementary Files

**File Name:** Supplementary Data 1

**Description:** The characteristics of the studies included in the systematic review. Footnotes:

1 Multinational: US, Canada, West Indies, UK, Israel, Singapore, Thailand, China, Australia

2 Multinational: Spain, UK, Austria, Belgium, Denmark, Italy, Ireland, Poland, Netherlands

3 Multinational: Bellflower, CA, US; Cleveland, OH, US; Brisbane, QLD, Australia;

Newcastle, NSW, Australia; Hong Kong, China

4 Multinational: New Zealand & Australia

5 Multinational: HAPO (Cleveland, Bellflower, Brisbane, Newcastle, Hong Kong)

NR: not reported

**File Name:** Supplementary Data 2

**Description:** Characteristics of studies that included anthropometry

Footnotes:

a BMI is reported as mean/median depending on how the study originally reported it or else as %; ¥ % of women with GDM with a BMI  $\geq 30.0$  kg/m<sup>2</sup> ; § % of women with GDM with a BMI  $\geq 25.0$  kg/m<sup>2</sup>

Multinational a: USA, Canada, West Indies, UK, Israel, Singapore, Thailand, China, Australia

**File Name:** Supplementary Data 3

**Description:** Characteristics of studies included as biochemical, genetics, -omics

Footnotes: a BMI is reported as mean/median depending on how the study originally reported it or else as % : ¥ % of women with GDM with a BMI  $\geq 30.0$  kg/m<sup>2</sup> ; § % of women with GDM with a BMI  $\geq 25.0$  kg/m<sup>2</sup>

Multinational a: Bellflower, CA, USA; Cleveland, OH, USA; Brisbane, QLD, Australia;

Newcastle, NSW, Australia; Hong Kong, China

Multinational b: HAPO (Cleveland, Bellflower, Brisbane, Newcastle, Hong Kong)

Multinational c: Spain, UK, Austria, Belgium, Denmark, Italy, Ireland, Poland, Netherlands

**File Name:** Supplementary Data 4

**Description:** Characteristics of studies included as clinical or sociocultural risk factors

Footnotes: a BMI is reported as mean/median depending on how the study originally reported it or else as %; ¥ % of women with GDM with a BMI  $\geq 30.0$  kg/m<sup>2</sup>; § % of women with a GDM with a BMI  $\geq 25.0$  kg/m<sup>2</sup>

**File Name:** Supplementary Data 5

**Description:** Dataset used to generate Figure 2. (quality assessment of the included studies by critical appraisal domain). The risk of bias and overall quality of each study was assessed independently or in duplicate using the Joanna Briggs Institute (JBI) Critical Appraisal Tool for cohort studies, which was modified specifically for the objectives of the current systematic review. For each question, a reviewer could indicate “not applicable”, “yes”, “unclear”, “no”. An answer of “yes” indicates less risk of bias and greater quality, and answer of “no” indicates a higher risk of bias and lower quality.
